# Supplementary material
Source: Springer Nature journal article supplement (https://www.springermedizin.de/resource/supplementary/12957_2011_920_MOESM1_ESM.pdf/9561578)

Cumulative survival

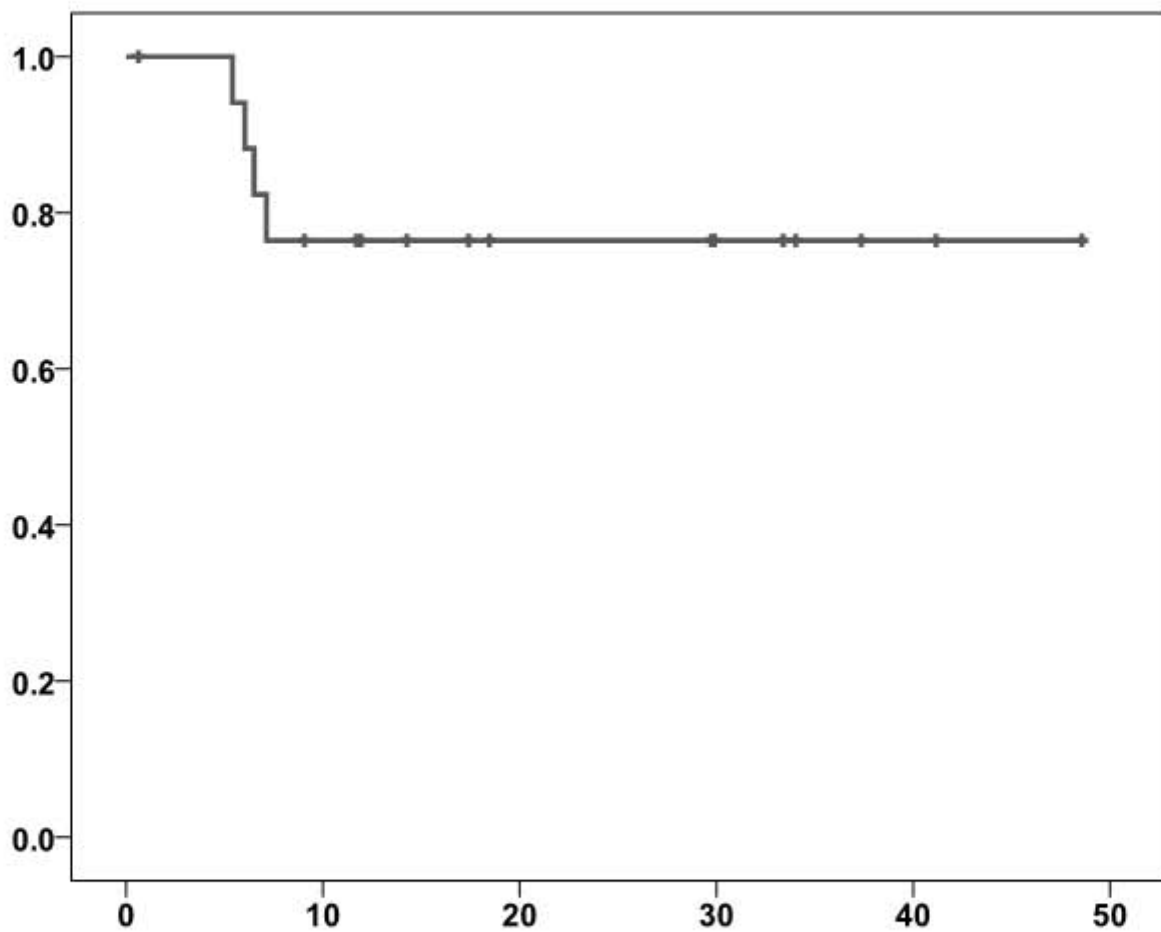

Time to progression (month)

Supplement: MOESM1 [file 9561578]
